# Supplementary material
Source: MDPI journal article supplement (https://www.mdpi.com/2079-6412/14/5/576)
Supplement: s1 [file s1]

# Supplementary Materials: Porous and Ag-, Cu-, Zn-Doped $\text{Al}_2\text{O}_3$ Fabricated via Barrier Anodizing of Pure Al and Alloys

Alexander Poznyak <sup>1,2</sup>, Gerhard Knörnschild <sup>3</sup>, Aliaksandr Hoha <sup>1</sup> and Andrei Pligovka <sup>1,\*</sup>

<sup>1</sup> Research and Development Laboratory 4.10 “Nanotechnologies”, Belarusian State University of Informatics and Radioelectronics, 6 Brovki Str., 220013 Minsk, Belarus; Belarus; poznyak@bsuir.by (A.P.); a.goga@bsuir.by (A.H.)

<sup>2</sup> Department of Electronic Technology and Engineering, Belarusian State University of Informatics and Radioelectronics, 6 Brovki Str., 220013 Minsk, Belarus

<sup>3</sup> Department of Metallurgy, Federal University of Rio Grande do Sul, Porto Alegre 90040-060, Brazil; [gerhard.hans@ufrgs.br](mailto:gerhard.hans@ufrgs.br)

\* Correspondence: [pligovka@bsuir.by](mailto:pligovka@bsuir.by); Tel.: +375-44-730-95-81; Fax: +375-17-293-23-56

## S1. AES surface of AlCu4 oxide thin films obtained by BA anodizing.

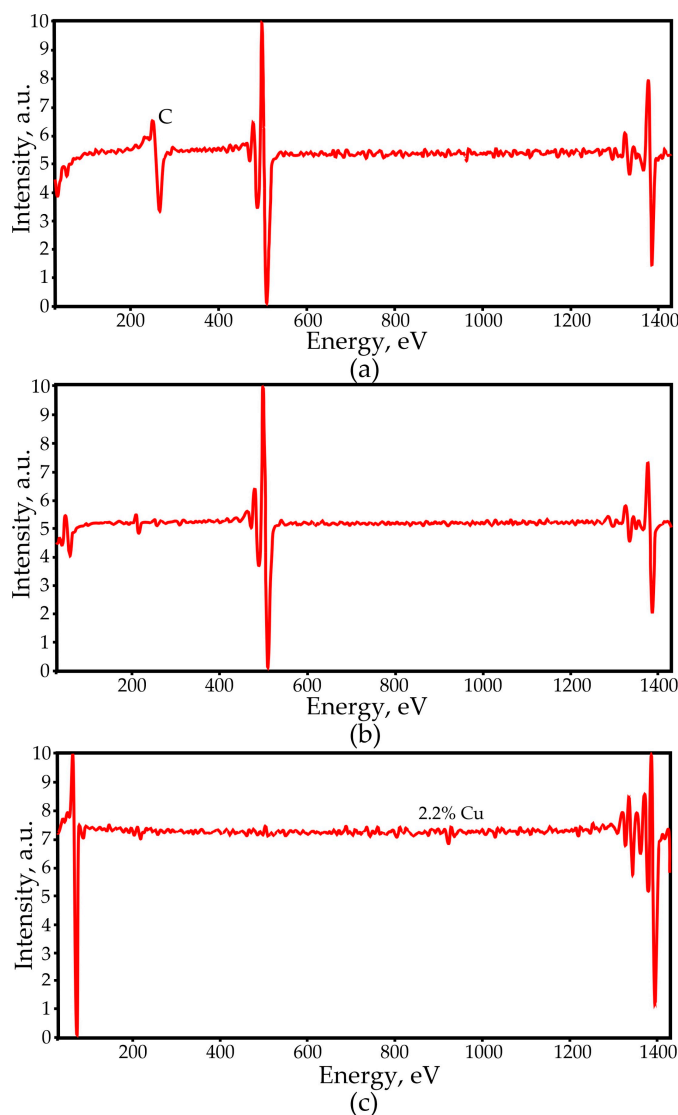

**Figure S1.** AES surface of AlCu4 oxide obtained by BA 100V anodizing of 1.43 mA·cm<sup>-2</sup> anodic current density: (a) before sputtering, (b) 13 min sputtering and (c) 23.36 min sputtering.

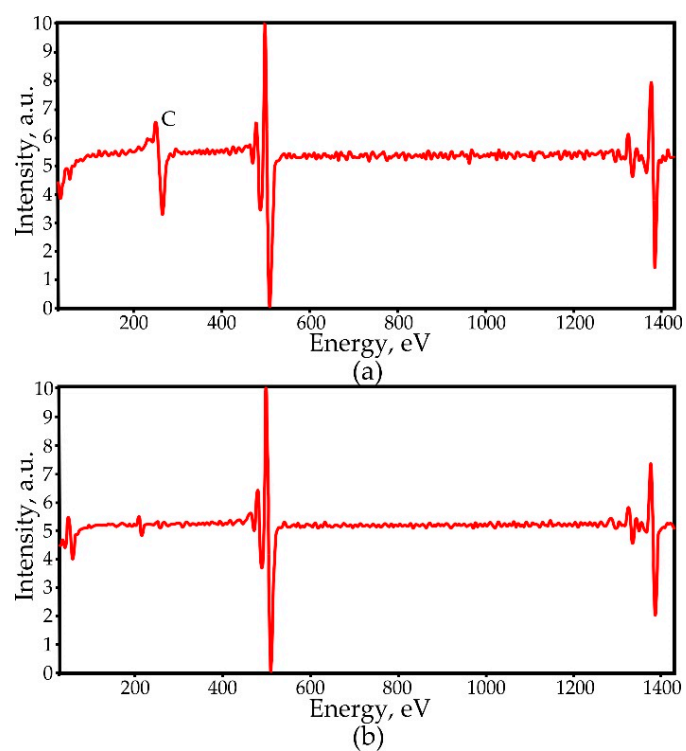

**Figure S2.** AES surface of AlCu4 oxide obtained by BA full anodizing of  $1.43 \text{ mA}\cdot\text{cm}^{-2}$  anodic current density: (a) before sputtering and (b) 30 min sputtering.

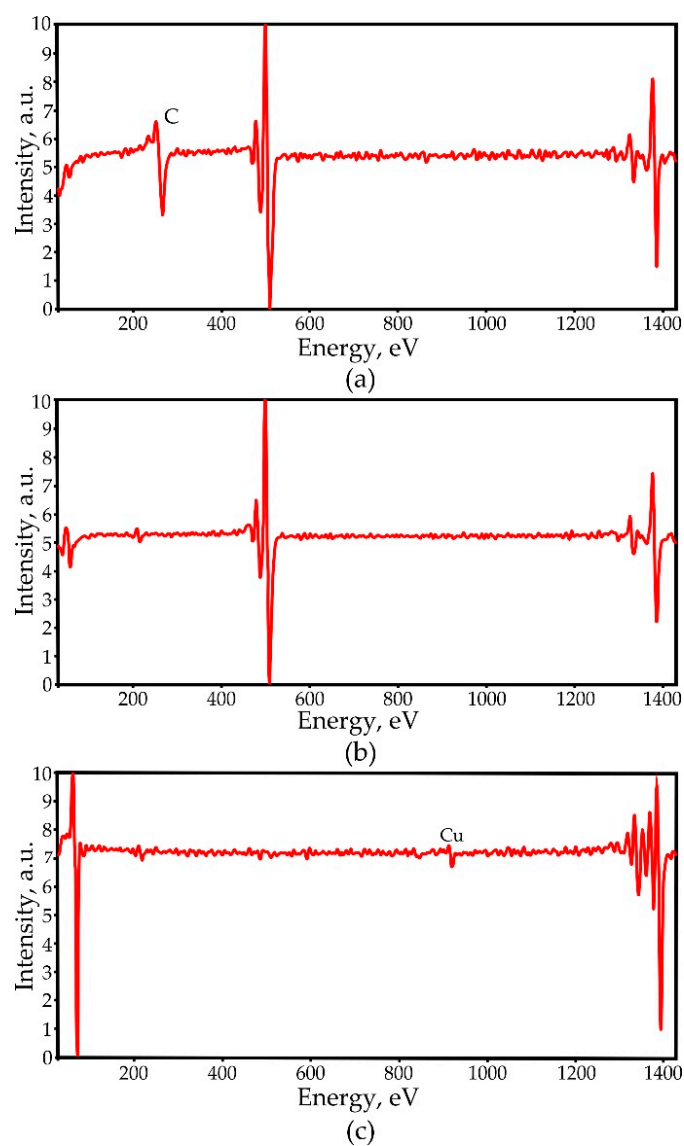

**Figure S3.** AES surface of AlCu<sub>4</sub> oxide obtained by BA full anodizing of 9.1 mA·cm<sup>-2</sup> anodic current density: (a) before sputtering, (b) 10 min sputtering and (c) 28.40 min sputtering.

**S2. AES surface of AlCu4 oxide thin films obtained by CB anodizing.**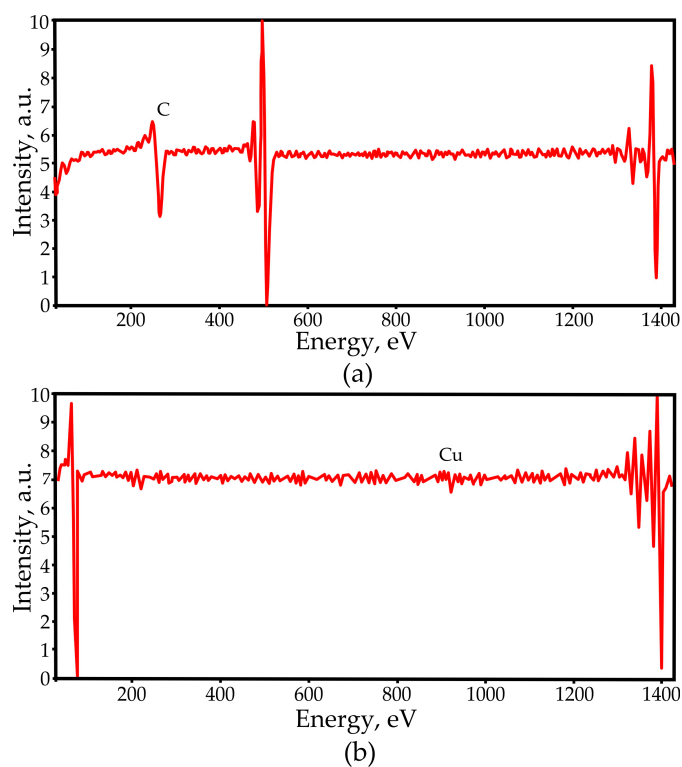

**Figure S4.** AES surface of AlCu4 oxide obtained by CB 100V anodizing of  $1.72 \text{ mA}\cdot\text{cm}^{-2}$  anodic current density: (a) before sputtering and (b) 25.40 min sputtering.



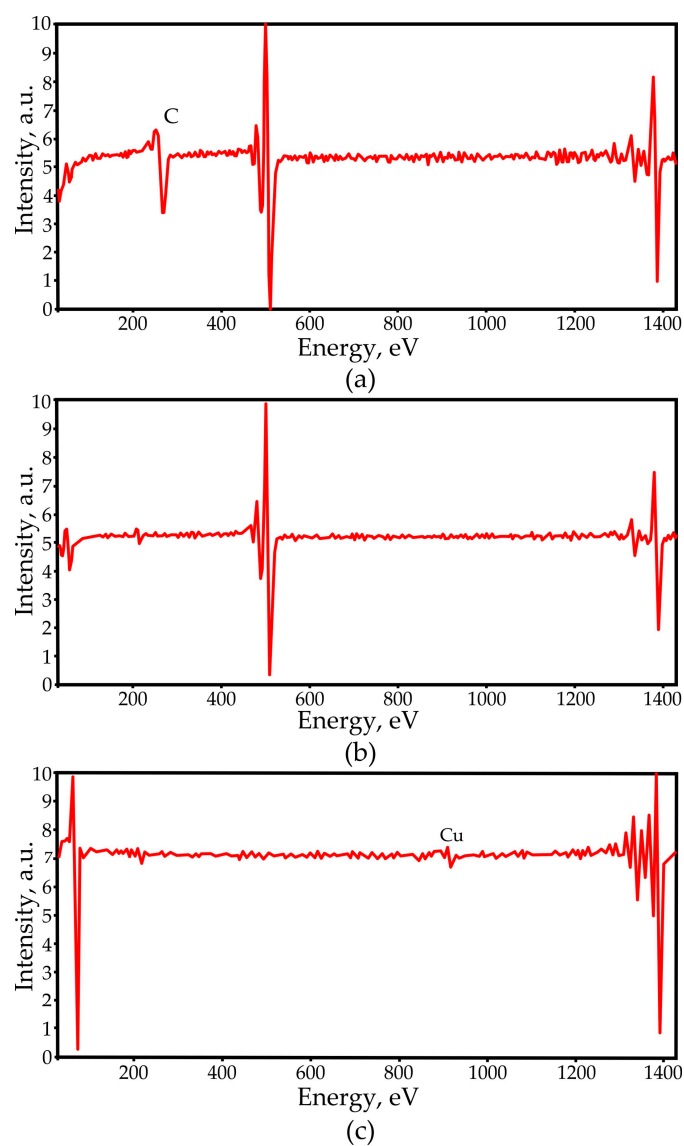

**Figure S5.** AES surface of AlCu<sub>4</sub> oxide obtained by CB full anodizing of 1.65 mA·cm<sup>-2</sup> anodic current density: (a) before sputtering, (b) 11 min sputtering and (c) 30 min sputtering.

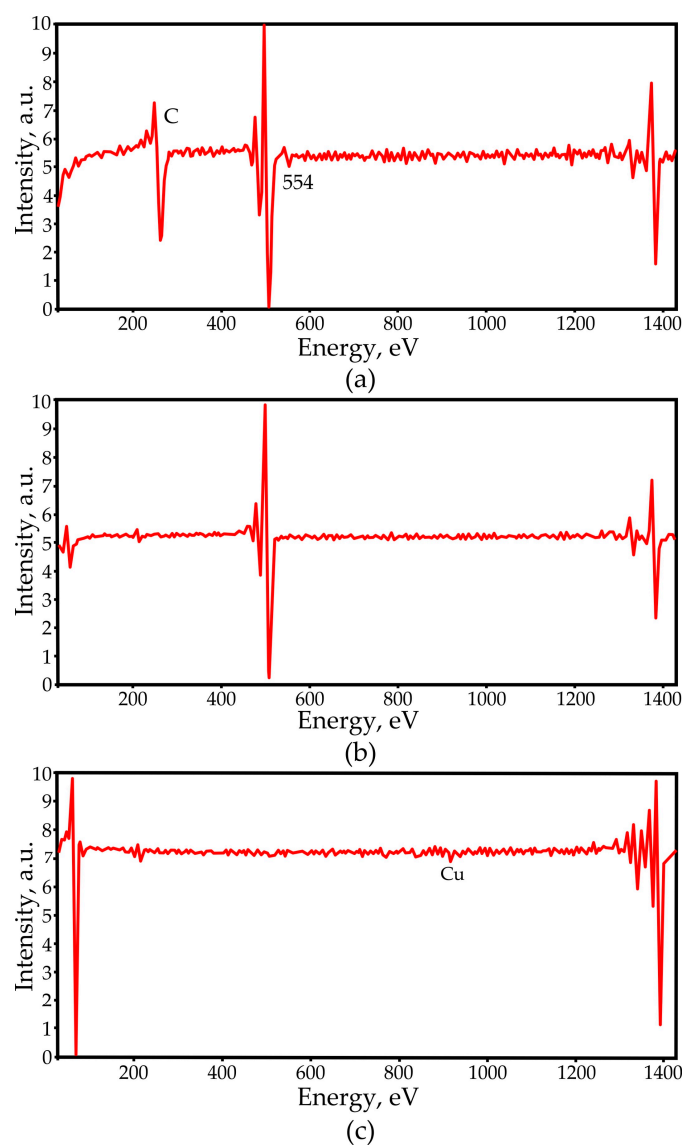

**Figure S6.** AES surface of AlCu<sub>4</sub> oxide obtained by CB 100V anodizing of 12.05 mA·cm<sup>-2</sup> anodic current density: (a) before sputtering, (b) 9 min sputtering and (c) 25 min sputtering.

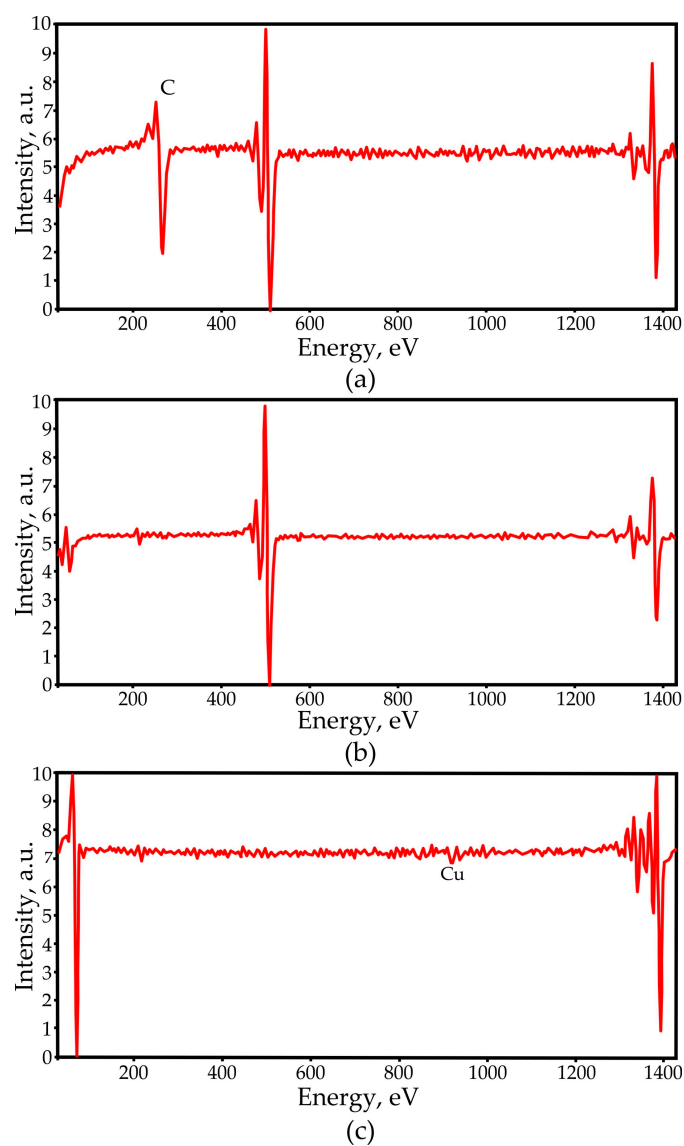

**Figure S7.** AES surface of AlCu<sub>4</sub> oxide obtained by CB full anodizing of 11.21 mA·cm<sup>-2</sup> anodic current density: (a) before sputtering, (b) 13 min sputtering and (c) 30 min sputtering.

### S3. SEM of alumina obtained by BA and CB anodizing

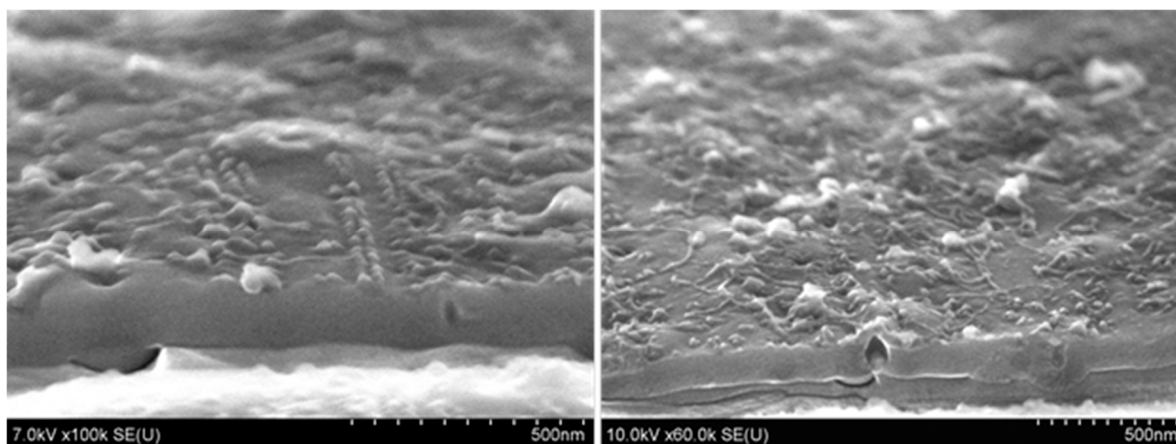

**Figure S8.** Surfaces and cross-sections of alumina obtained by BA 100 V galvanostatic anodizing of  $0.4 \text{ mA}\cdot\text{cm}^{-2}$  anodic current density.

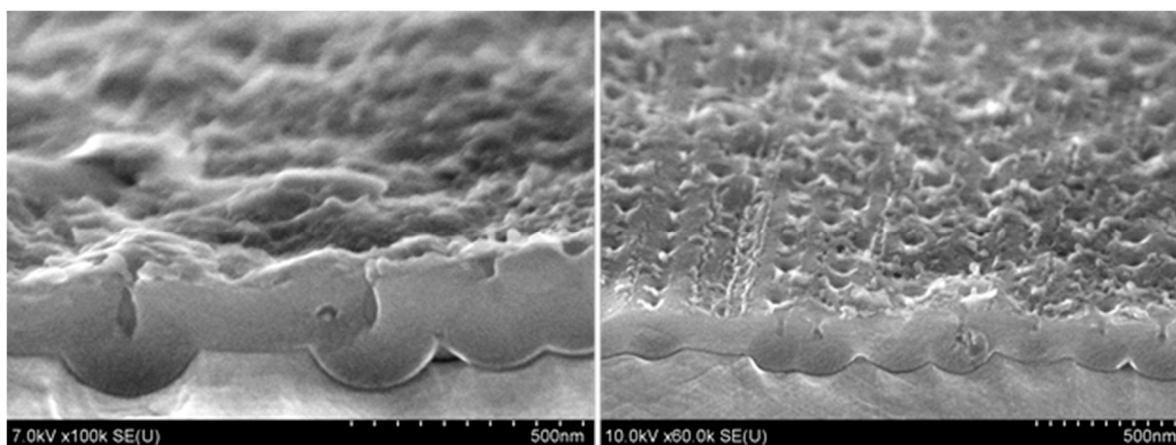

**Figure S9.** Surfaces and cross-sections of alumina obtained by BA full galvanostatic anodizing of  $0.4 \text{ mA}\cdot\text{cm}^{-2}$  anodic current density.

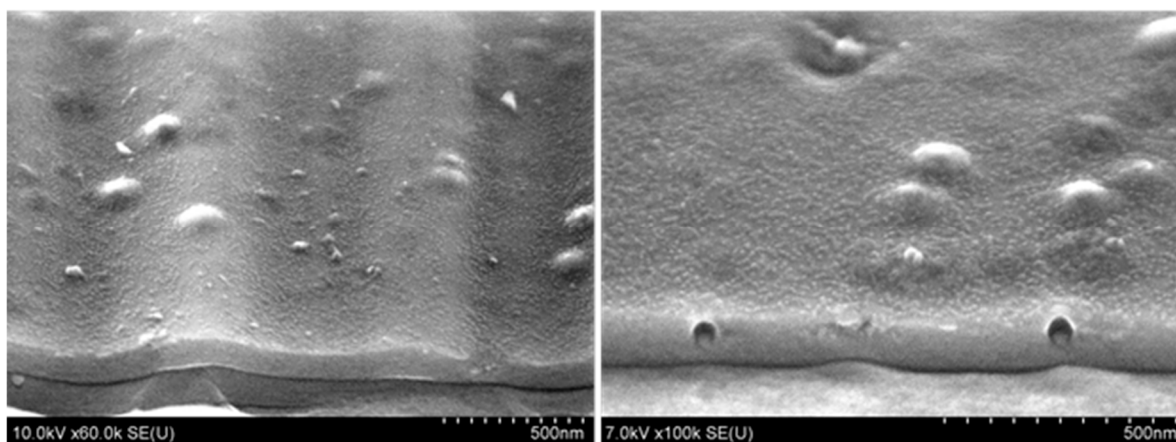

**Figure S10.** Surfaces and cross-sections of alumina obtained by CB 100 V galvanostatic anodizing of  $0.4 \text{ mA}\cdot\text{cm}^{-2}$  anodic current density.

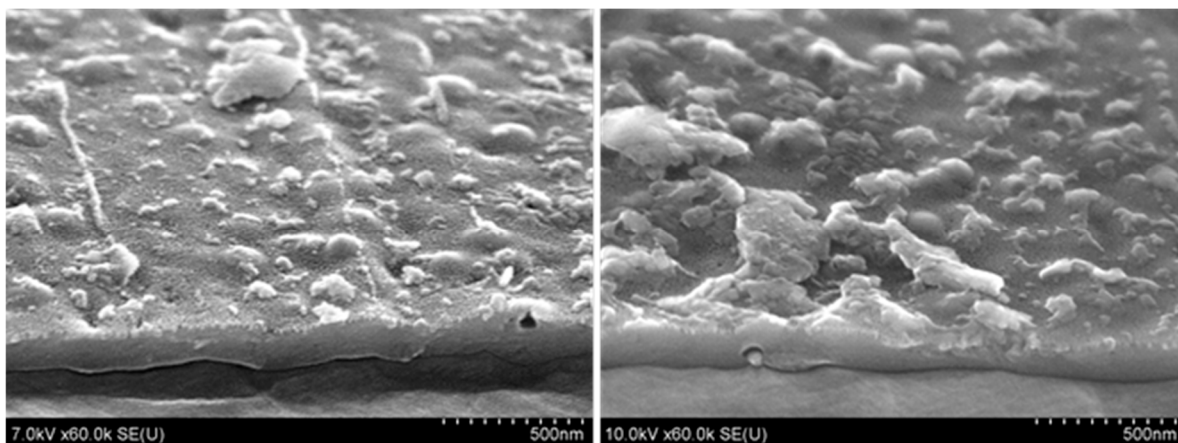

**Figure S11.** Surfaces and cross-sections of alumina obtained by CB full galvanostatic anodizing of  $0.4 \text{ mA}\cdot\text{cm}^{-2}$  anodic current density.

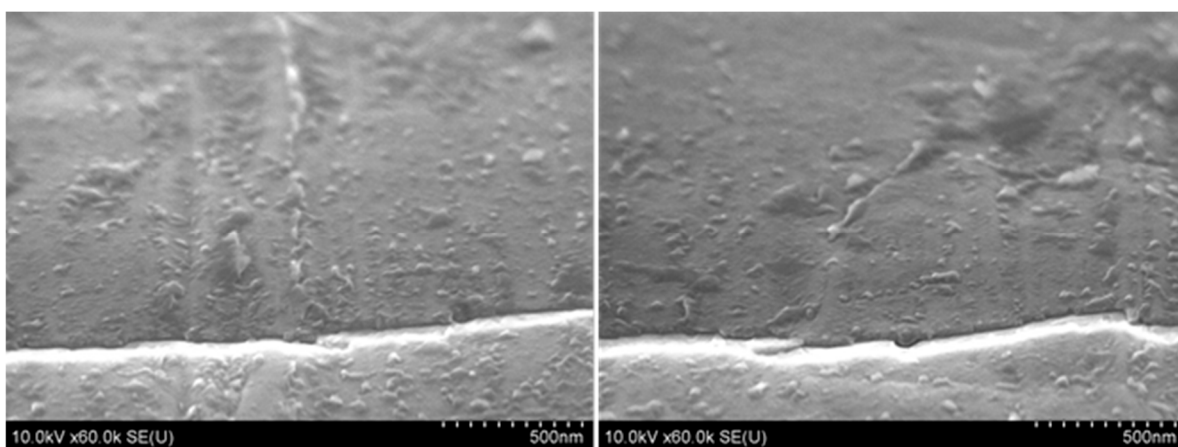

**Figure S12.** Surfaces and cross-sections of alumina obtained by BA 100 V galvanostatic anodizing of  $7.0 \text{ mA}\cdot\text{cm}^{-2}$  anodic current density.

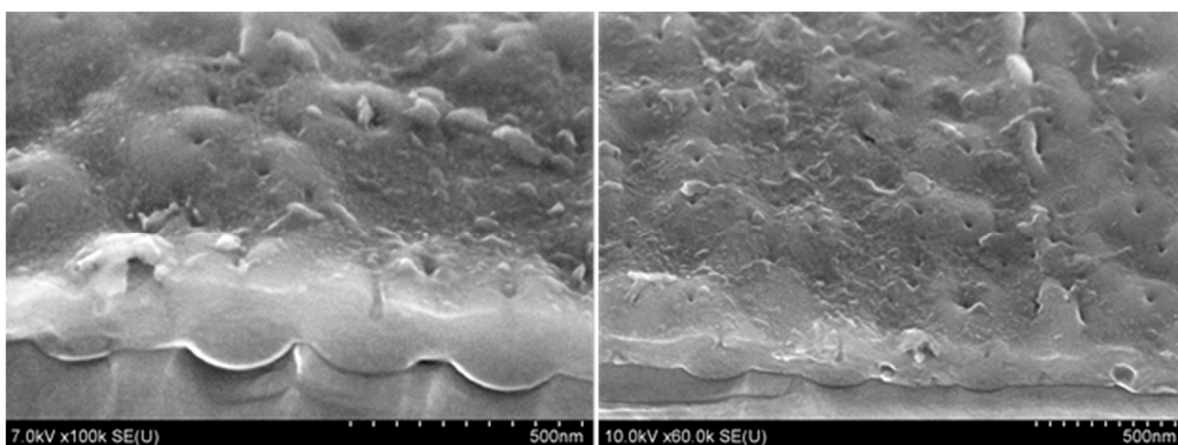

**Figure S13.** Surfaces and cross-sections of alumina obtained by BA full galvanostatic anodizing of  $7.0 \text{ mA}\cdot\text{cm}^{-2}$  anodic current density.

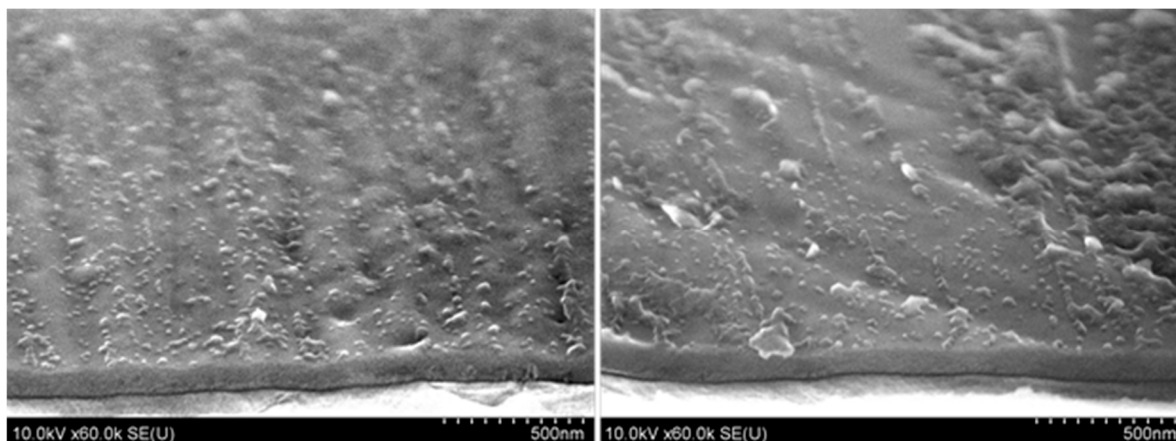

**Figure S14.** Surfaces and cross-sections of alumina obtained by CB 100 V galvanostatic anodizing of  $7.0 \text{ mA}\cdot\text{cm}^{-2}$  anodic current density.

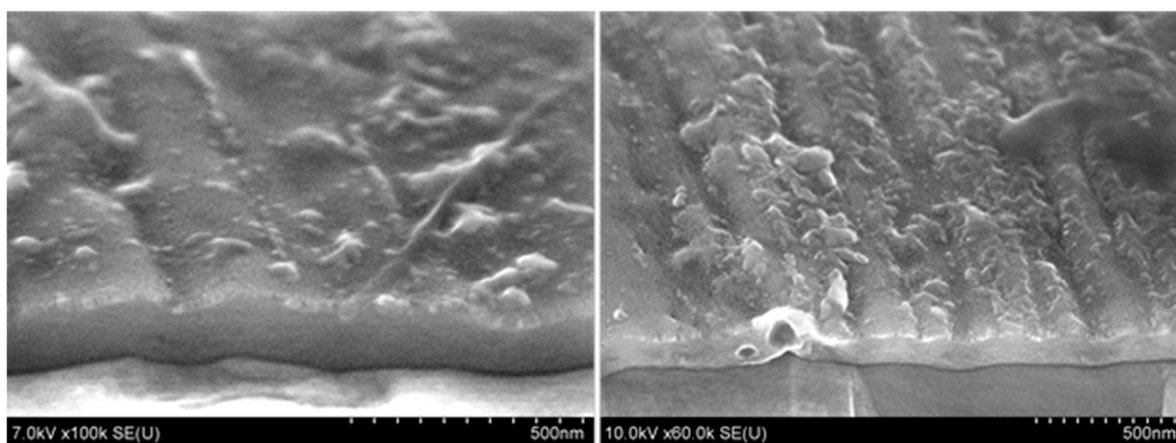

**Figure S15.** Surfaces and cross sections of alumina obtained by CB full galvanostatic anodizing of  $7.0 \text{ mA}\cdot\text{cm}^{-2}$  anodic current density.
